# Supplementary material for: Extent, duration and timing of the sea ice cover in Hornsund, Svalbard, from 2014–2023
Source: Copernicus journal article supplement (doi:10.5194/tc-18-895-2024), 2024-02-27
Supplement: Supplementary file 1 [file tc-18-895-2024-supplement.zip]

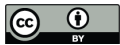

*Supplement of*

**Extent, duration and timing of the sea ice cover in Hornsund, Svalbard, from 2014–2023**

**Zuzanna M. Swirad et al.**

*Correspondence to:* Zuzanna M. Swirad (zswirad@igf.edu.pl)

- tc-18-895-2024-supplement-title-page.pdf
- supplement
  - TableS1\_SeaIceHornsund.txt
  - TableS2\_Validation.csv

The copyright of individual parts of the supplement might differ from the article licence.
